# Supplementary material for: Chemotherapy Induces Programmed Cell Death-Ligand 1 Overexpression via the Nuclear Factor-κB to Foster an Immunosuppressive Tumor Microenvironment in Ovarian Cancer
Source: Oxford University Press journal article supplement (doi:10.1158/0008-5472.can-14-3098), 2015-11-16
Supplement: 00085472can143098-sup-139775_2_supp_0_nvrj3n.doc [file 00085472can143098-sup-139775_2_supp_0_nvrj3n.doc]

**Supplementary Table 1.**

Upregulated pathways related to immune response in GSE15622

|  | | |
| --- | --- | --- |
| No. | Gene Ontology | *P* value |
| 1 | GO:0009607 [4]: response to biotic stimulus | <0.0001 |
| **2** | **GO:0006955 [4]: immune response** | **<0.0001** |
| 3 | GO:0006952 [5]: defense response | <0.0001 |
| 4 | GO:0050794 [3]: regulation of cellular process | <0.0001 |
| 5 | GO:0007154 [3]: cell communication | <0.0001 |
| 6 | GO:0007243 [6]: protein kinase cascade | <0.0001 |
| 7 | GO:0009613 [5]: response to pest, pathogen or parasite | <0.0001 |
| 8 | GO:0007242 [5]: intracellular signaling cascade | <0.0001 |
| 9 | GO:0007165 [4]: signal transduction | <0.0001 |
| 10 | GO:0007606 [6]: sensory perception of chemical stimulus | <0.0001 |
| 11 | GO:0043207 [5]: response to external biotic stimulus | <0.0001 |
| **12** | **GO:0006959 [5]: humoral immune response** | **<0.0001** |
| 13 | GO:0007608 [7]: perception of smell | <0.0001 |
| 14 | GO:0006950 [4]: response to stress | <0.0001 |
| 15 | GO:0009966 [4]: regulation of signal transduction | <0.0001 |
| 16 | GO:0016064 [6]: humoral defense mechanism (sensu Vertebrata) | <0.0001 |
| 17 | GO:0050896 [3]: response to stimulus | <0.0001 |
| 18 | GO:0009611 [5]: response to wounding | <0.0001 |
| **19** | **GO:0006954 [5]: inflammatory response** | **<0.0001** |
| 20 | GO:0007186 [6]: G-protein coupled receptor protein signaling pathway | <0.0001 |
| 21 | GO:0051244 [4]: regulation of cellular physiological process | <0.0001 |
| 22 | GO:0045184 [5]: establishment of protein localization | <0.0001 |
| 23 | GO:0050877 [4]: neurophysiological process | <0.0001 |
| 24 | GO:0008104 [4]: protein localization | <0.0001 |
| 25 | GO:0015031 [5]: protein transport | <0.0001 |
| 26 | GO:0007155 [4]: cell adhesion | <0.0001 |
| **27** | **GO:0030098 [4]: lymphocyte differentiation** | **0.000112788** |
| **28** | **GO:0046649 [6]: lymphocyte activation** | **0.000112788** |
| **29** | **GO:0008219 [4]: cell death** | **0.000112788** |
| **30** | **GO:0016265 [3]: death** | **0.000127168** |
| 31 | GO:0040007 [3]: growth | 0.000155324 |
| **32** | **GO:0045321 [5]: immune cell activation** | **0.000184106** |
| 33 | GO:0001775 [4]: cell activation | 0.000197455 |
| 34 | GO:0030155 [4]: regulation of cell adhesion | 0.000197455 |
| **35** | **GO:0006915 [6]: apoptosis** | **0.000197455** |
| **36** | **GO:0007249 [7]: I-κB kinase/NF-κB cascade** | **0.000197455** |
| **37** | **GO:0042981 [6]: regulation of apoptosis** | **0.000197455** |
| **38** | **GO:0012501 [5]: programmed cell death** | **0.000224867** |
| **39** | **GO:0043067 [5]: regulation of programmed cell death** | **0.000224867** |
| 40 | GO:0007259 [7]: JAK-STAT cascade | 0.000224867 |
| 41 | GO:0051242 [5]: positive regulation of cellular physiological process | 0.000253537 |
| 42 | GO:0019735 [7]: antimicrobial humoral response (sensu Vertebrata) | 0.000297529 |
| 43 | GO:0006366 [8]: transcription from Pol II promoter | 0.000297529 |
| 44 | GO:0050789 [2]: regulation of biological process | 0.000367055 |
| 45 | GO:0019730 [6]: antimicrobial humoral response | 0.000367055 |
| **46** | **GO:0006928 [4]: cell motility** | **0.000581442** |
| **47** | **GO:0012502 [7]: induction of programmed cell death** | **0.000581442** |
| 48 | GO:0016049 [4]: cell growth | 0.000581442 |
| **49** | **GO:0006917 [8]: induction of apoptosis** | **0.000581442** |
| 50 | GO:0008361 [5]: regulation of cell size | 0.000581442 |
| **51** | **GO:0043122 [5]: regulation of I-κB kinase/NF-κB cascade** | **0.000649051** |
| 52 | GO:0009967 [5]: positive regulation of signal transduction | 0.000930303 |
| 53 | GO:0006886 [6]: intracellular protein transport | 0.000930303 |
| 54 | GO:0009653 [3]: morphogenesis | 0.001268399 |
| **55** | **GO:0043123 [6]: positive regulation of I-κB kinase/NF-κB cascade** | **0.001268399** |
| **56** | **GO:0043065 [7]: positive regulation of apoptosis** | **0.00185476** |
| 57 | GO:0043118 [4]: negative regulation of physiological process | 0.002009237 |
| 58 | GO:0016192 [5]: vesicle-mediated transport | 0.002112253 |
| **59** | **GO:0043068 [6]: positive regulation of programmed cell death** | **0.002112253** |
| 60 | GO:0007264 [6]: small GTPase–mediated signal transduction | 0.002311173 |
| 61 | GO:0000902 [4]: cellular morphogenesis | 0.002381559 |
| 62 | GO:0050793 [3]: regulation of development | 0.002579912 |
| 63 | GO:0009887 [4]: organogenesis | 0.0026852 |
| 64 | GO:0048513 [3]: organ development | 0.0026852 |
| 65 | GO:0048193 [6]: Golgi vesicle transport | 0.002851244 |
| 66 | GO:0043119 [4]: positive regulation of physiological process | 0.003027555 |
| 67 | GO:0019226 [5]: transmission of nerve impulse | 0.003588575 |
| 68 | GO:0006357 [8]: regulation of transcription from Pol II promoter | 0.004383096 |
| 69 | GO:0050874 [3]: organismal physiological process | 0.005143611 |
| 70 | GO:0007268 [6]: synaptic transmission | 0.005684569 |
| 71 | GO:0009618 [7]: response to pathogenic bacteria | 0.005684569 |
| **72** | **GO:0042110 [7]: T-cell activation** | **0.007083409** |
| 73 | GO:0040008 [4]: regulation of growth | 0.007986521 |
| 74 | GO:0046907 [5]: intracellular transport | 0.008738646 |
| 75 | GO:0051243 [5]: negative regulation of cellular physiological process | 0.009186686 |
| 76 | GO:0006897 [6]: endocytosis | 0.009561602 |
| 77 | GO:0030001 [7]: metal ion transport | 0.012155178 |
| **78** | **GO:0042113 [7]: B-cell activation** | **0.012906813** |
| 79 | GO:0050875 [3]: cellular physiological process | 0.01343355 |
| 80 | GO:0006812 [6]: cation transport | 0.014264234 |
| 81 | GO:0007156 [6]: homophilic cell adhesion | 0.014846368 |
| 82 | GO:0030097 [5]: hemopoiesis | 0.014846368 |
| 83 | GO:0042330 [5]: taxis | 0.016572675 |
| 84 | GO:0006935 [6]: chemotaxis | 0.016572675 |
| 85 | GO:0007265 [7]: Ras protein signal transduction | 0.017249019 |
| 86 | GO:0001558 [4]: regulation of cell growth | 0.018133395 |
| 87 | GO:0009596 [6]: detection of pest, pathogen or parasite | 0.019063114 |
| 88 | GO:0016477 [5]: cell migration | 0.020040501 |
| 89 | GO:0008283 [4]: cell proliferation | 0.020040501 |
| 90 | GO:0050817 [3]: coagulation | 0.020858369 |
| 91 | GO:0009605 [4]: response to external stimulus | 0.023052063 |
| 92 | GO:0007600 [5]: sensory perception | 0.024723526 |
| 93 | GO:0009628 [5]: response to abiotic stimulus | 0.027323722 |
| 94 | GO:0051170 [7]: nuclear import | 0.027323722 |
| 95 | GO:0006606 [7]: protein-nucleus import | 0.027323722 |
| 96 | GO:0007599 [5]: hemostasis | 0.027323722 |
| 97 | GO:0006811 [5]: ion transport | 0.02872464 |
| 98 | GO:0042221 [6]: response to chemical substance | 0.02872464 |
| **99** | **GO:0030217 [5]: T-cell differentiation** | **0.02872464** |
| 100 | GO:0007162 [5]: negative regulation of cell adhesion | 0.02872464 |

**Supplementary Table 2**

| Characteristics |  |  | |
| --- | --- | --- | --- |
| Age (years) |  |  | |
|  | mean ± SD | 56.9 ± 10.1 | |
|  | min–max | 43–74 | |
| FIGO stage (n) |  |  |  |
|  | 1C | 1 | |
|  | 2C | 1 | |
|  | 3A | 1 | |
|  | 3B | 1 | |
|  | 3C | 12 | |
|  | 4 | 5 | |
| Histology (n) |  |  |  |
|  | serous | 17 | |
|  | endometrioid | 3 | |
|  | clear | 1 | |
| Chemotherapy (n) |  |  |  |
|  | Paclitaxel | 11 | |
|  | Carboplatin | 12 | |
|  | Cisplatin | 10 | |
|  | Docetaxel | 1 | |
| Tumor infiltrating CD8+ T cells / HPF | |  |  |
|  |  | 1st operation | 2nd operation |
|  | mean ± SD | 12.6 ± 19.7 | 20.6 ± 23.5 |

**Supplementary Table** 3

| IHC list | ID | membrane staining | |  |  | cytoplasmic staining | |  | nuclear staining | |  |  |
| --- | --- | --- | --- | --- | --- | --- | --- | --- | --- | --- | --- | --- |
|  |  | − | + | ++ | PD-L1 | − | + | ++ | − | + | ++ | NF-κB p65 |
|  |  | ×0 | ×1 | ×2 | score | ×0 | ×1 | ×2 | ×0 | ×1 | ×2 | score |
| control (PTX) | 1 | 4 | 3 | 1 | 5 | 3 | 4 | 1 | 4 | 2 | 1 | 10 |
|  | 2 | 4 | 3 | 1 | 5 | 2 | 4 | 2 | 4 | 2 | 1 | 12 |
|  | 3 | 3 | 3 | 1 | 5 | 1 | 4 | 2 | 4 | 2 | 1 | 12 |
|  | 4 | 4 | 3 | 1 | 5 | 3 | 3 | 2 | 3 | 3 | 1 | 12 |
|  | 5 | 3 | 3 | 1 | 5 | 4 | 3 | 1 | 4 | 2 | 1 | 9 |
| PTX-treated | 1 | 1 | 2 | 3 | 8 | 1 | 3 | 4 | 1 | 3 | 4 | 22 |
|  | 2 | 1 | 3 | 3 | 9 | 3 | 2 | 3 | 2 | 3 | 3 | 17 |
|  | 3 | 1 | 3 | 3 | 9 | 2 | 3 | 3 | 3 | 3 | 2 | 16 |
|  | 4 | 1 | 3 | 4 | 11 | 2 | 2 | 4 | 1 | 3 | 4 | 21 |
|  | 5 | 2 | 2 | 4 | 10 | 2 | 2 | 3 | 1 | 4 | 3 | 18 |
| control (GEM) | 1 | 3 | 3 | 1 | 5 | 4 | 3 | 1 | 4 | 2 | 1 | 9 |
|  | 2 | 4 | 2 | 2 | 6 | 4 | 3 | 1 | 4 | 2 | 1 | 9 |
|  | 3 | 4 | 3 | 1 | 5 | 4 | 3 | 1 | 4 | 2 | 1 | 9 |
|  | 4 | 4 | 2 | 1 | 4 | 4 | 2 | 2 | 4 | 3 | 1 | 11 |
|  | 5 | 3 | 3 | 1 | 5 | 3 | 2 | 2 | 4 | 2 | 1 | 10 |
| GEM-treated | 1 | 2 | 3 | 4 | 11 | 2 | 3 | 3 | 1 | 4 | 3 | 19 |
|  | 2 | 2 | 3 | 3 | 9 | 2 | 3 | 3 | 1 | 3 | 4 | 20 |
|  | 3 | 2 | 2 | 4 | 10 | 1 | 4 | 2 | 2 | 3 | 2 | 15 |
|  | 4 | 2 | 3 | 4 | 11 | 3 | 2 | 3 | 1 | 3 | 3 | 17 |
|  | 5 | 2 | 2 | 4 | 10 | 2 | 3 | 3 | 4 | 2 | 3 | 17 |
| 0,(−) | 1, <10% | | | Score = proportion×(degree−) + proportion×(degree+) + proportion×(degree++) | | | | | | | | |
| 1, (+) | 2, 10%–25% | | |
| 2, (++) | 3, 25%–50% | | |
|  | 4, >50% | | |

**Supplementary Table 4**

| IHC list | ID | CD8+ T cell number | | | | mean | CD4+ T cell number | | | | mean | Gr-1+ cell number | | | | mean |
| --- | --- | --- | --- | --- | --- | --- | --- | --- | --- | --- | --- | --- | --- | --- | --- | --- |
| control (PTX) | 1 | 3 | 0 | 2 | 3 | 2 | 6 | 5 | 4 | 9 | 6 | 20 | 25 | 10 | 19 | 18.5 |
|  | 2 | 0 | 0 | 2 | 2 | 1 | 2 | 9 | 10 | 5 | 6.5 | 25 | 31 | 25 | 10 | 22.75 |
|  | 3 | 1 | 1 | 0 | 2 | 1 | 10 | 5 | 10 | 2 | 6.75 | 17 | 19 | 26 | 29 | 22.75 |
|  | 4 | 3 | 2 | 2 | 3 | 2.5 | 12 | 11 | 10 | 2 | 8.75 | 19 | 32 | 27 | 25 | 25.75 |
|  | 5 | 0 | 0 | 0 | 0 | 0 | 7 | 10 | 2 | 5 | 6 | 26 | 28 | 21 | 16 | 22.75 |
| PTX-treated | 1 | 9 | 8 | 6 | 5 | 7 | 39 | 69 | 62 | 57 | 56.75 | 14 | 19 | 20 | 29 | 20.5 |
|  | 2 | 4 | 5 | 3 | 4 | 4 | 59 | 72 | 51 | 62 | 61 | 26 | 25 | 21 | 25 | 24.25 |
|  | 3 | 15 | 19 | 17 | 12 | 15.75 | 49 | 52 | 32 | 29 | 40.5 | 28 | 19 | 27 | 12 | 21.5 |
|  | 4 | 19 | 21 | 13 | 16 | 17.25 | 25 | 19 | 30 | 15 | 22.25 | 19 | 21 | 13 | 16 | 17.25 |
|  | 5 | 7 | 8 | 5 | 10 | 7.5 | 19 | 15 | 10 | 25 | 17.25 | 21 | 19 | 19 | 29 | 22 |
| control (GEM) | 1 | 2 | 0 | 2 | 3 | 1.75 | 6 | 5 | 4 | 9 | 6 | 20 | 26 | 28 | 21 | 23.75 |
|  | 2 | 0 | 0 | 1 | 2 | 0.75 | 2 | 8 | 10 | 5 | 6.25 | 18 | 15 | 21 | 22 | 19 |
|  | 3 | 1 | 1 | 0 | 2 | 1 | 5 | 5 | 7 | 2 | 4.75 | 21 | 21 | 20 | 25 | 21.75 |
|  | 4 | 2 | 0 | 2 | 3 | 1.75 | 12 | 11 | 10 | 4 | 9.25 | 26 | 21 | 31 | 15 | 23.25 |
|  | 5 | 0 | 0 | 0 | 0 | 0 | 7 | 6 | 2 | 5 | 5 | 18 | 15 | 27 | 17 | 19.25 |
| GEM-treated | 1 | 10 | 7 | 3 | 5 | 6.25 | 12 | 19 | 20 | 20 | 17.75 | 15 | 17 | 25 | 5 | 15.5 |
|  | 2 | 2 | 8 | 2 | 3 | 3.75 | 78 | 69 | 32 | 45 | 56 | 8 | 8 | 10 | 3 | 7.25 |
|  | 3 | 7 | 6 | 2 | 8 | 5.75 | 59 | 41 | 29 | 39 | 42 | 6 | 7 | 9 | 9 | 7.75 |
|  | 4 | 15 | 21 | 20 | 11 | 16.75 | 10 | 9 | 19 | 18 | 14 | 15 | 20 | 21 | 11 | 16.75 |
|  | 5 | 10 | 9 | 11 | 5 | 8.75 | 17 | 19 | 20 | 11 | 16.75 | 20 | 15 | 17 | 20 | 18 |
